# Supplementary material for: Enhanced Natural Regeneration Potential of Sessile Oak in Northern Hungary: Role of Artificially Increased Density of Insectivorous Birds
Source: MDPI journal article supplement (doi:10.3390/f14081548), 2023-07-28
Supplement: s1 [file s1]

Enhanced natural regeneration potential of sessile oak in Northern Hungary – role of artificially increased density of insectivorous birds  
by Csaba Béla Eötvös, Ágnes Fürjes-Mikó, Márton Paulin, Csaba Gáspár, Marcell Kárpáti, Anikó Hirka and György Csóka"

**Table S10.** Results of statistics of data collected by seedling counting

```
PQL <- glmmPQL(ABUNDANCE.t ~ Site, ~1 | Quadrat_ID, family = gaussian(link = "log"), data = Seedling)
summary(PQL)
```

Linear mixed-effects model fit by maximum likelihood

Data: Seedling

| AIC | BIC | logLik |
|-----|-----|--------|
| NA  | NA  | NA     |

Random effects:

Formula: ~1 | Quadrat\_ID

|         | (Intercept) | Residual |
|---------|-------------|----------|
| StdDev: | 0.630524    | 0.000117 |

Variance function:

Structure: fixed weights

Formula: ~invwt

Fixed effects: ABUNDANCE.t ~ Site

|             | Value    | Std.Error | DF  | t-value | p-value |
|-------------|----------|-----------|-----|---------|---------|
| (Intercept) | 0.866969 | 0.036464  | 598 | 23.7759 | 0       |
| SiteSample  | 0.604569 | 0.051568  | 598 | 11.7237 | 0       |

Correlation:

|            | (Intr) |
|------------|--------|
| SiteSample | -0.707 |

Standardized Within-Group Residuals:

| Min                    | Q1                     | Med                    | Q3                    | Max                   |
|------------------------|------------------------|------------------------|-----------------------|-----------------------|
| -1.33×10 <sup>-4</sup> | -7.88×10 <sup>-5</sup> | -6.08×10 <sup>-6</sup> | 2.30×10 <sup>-5</sup> | 4.74×10 <sup>-5</sup> |

Number of Observations: 600

Number of Groups: 600

anova.lme(PQL, test="F")

|             | numDF | denDF | F-value  | p-value |
|-------------|-------|-------|----------|---------|
| (Intercept) | 1     | 598   | 2056.437 | <0.0001 |
| Site        | 1     | 598   | 137.4452 | <0.0001 |

summary(glht(PQL, linfct=mcp(Site="Tukey")))

Simultaneous Tests for General Linear Hypotheses

Multiple Comparisons of Means: Tukey Contrasts

```
Fit: glmmPQL(fixed = ABUNDANCE.t ~ Site, random = ~1 | Quadrat_ID, family = gaussian(link = "log"),
  data = Seedling)
```

Linear Hypotheses:

| Estimate | Std. Error | z value | Pr(> z ) |
|----------|------------|---------|----------|
|----------|------------|---------|----------|

|                       |         |         |       |                    |     |
|-----------------------|---------|---------|-------|--------------------|-----|
| Sample - Control == 0 | 0.60457 | 0.05148 | 11.74 | $<2\times10^{-16}$ | *** |
|-----------------------|---------|---------|-------|--------------------|-----|

---

Signif. codes: 0 '\*\*\*' 0.001 '\*\*' 0.01 '\*' 0.05 '.' 0.1 ' ' 1

(Adjusted p values reported -- single-step method)
