# Supplementary material for: Enhanced Natural Regeneration Potential of Sessile Oak in Northern Hungary: Role of Artificially Increased Density of Insectivorous Birds
Source: MDPI journal article supplement (doi:10.3390/f14081548), 2023-07-28
Supplement: s1 [file s1]

"Supplementary material to the paper

Enhanced natural regeneration potential of sessile oak in Northern Hungary – role of artificially increased density of insectivorous birds

by Csaba Béla Eötvös, Ágnes Fürjes-Mikó, Márton Paulin, Csaba Gáspár, Marcell Kárpáti, Anikó Hirka and György Csóka"

**Species list S1. Carpophagous insects described from Hungary**

**Coleoptera, Curculionidae:**

*Curculio elephas*

*Curculio glandium*

*Curculio nucum*

*Curculio pellitus*

*Curculio propinquus*

*Curculio venosus*

**Lepidoptera:**

*Cydia amplana*

*Cydia fagiglandana*

*Cydia splendana*

*Pammene fasciana*

**Hymenoptera:**

*Andricus caputmedusae*

*Andricus dentimitratus*

*Andricus legitimus*

*Andricus lucidus*

*Andricus quercuscalicis*

*Andricus seckendorffi*

*Andricus superfetationis*

*Callirhytis glandium*

*Pseudoneuroterus saliens*
