# Supplementary material for: Enhanced Natural Regeneration Potential of Sessile Oak in Northern Hungary: Role of Artificially Increased Density of Insectivorous Birds
Source: MDPI journal article supplement (doi:10.3390/f14081548), 2023-07-28
Supplement: s1 [file s1]

Supplementary material to the paper

Enhanced natural regeneration potential of sessile oak in Northern Hungary – role of artificially increased density of insectivorous birds

by Csaba Béla Eötvös, Ágnes Fürjes-Mikó, Márton Paulin, Csaba Gáspár, Marcell Kárpáti, Anikó Hirka and György Csóka

**Table S6.** The catches of the lepidopteran groups with different baited funnel traps at the sample and control sites.

| Group            | Site    | NAA   | FLO   |
|------------------|---------|-------|-------|
| Noctuoidea       | Sample  | 4,077 | 1,177 |
|                  | Control | 4,091 | 1,390 |
| Noctuidae        | Sample  | 3,948 | 1,130 |
|                  | Control | 4,036 | 1,364 |
| Erebidae         | Sample  | 129   | 47    |
|                  | Control | 55    | 26    |
| Geometridae      | Sample  | 35    | 87    |
|                  | Control | 22    | 69    |
| Thyatiridae      | Sample  | 24    | 0     |
|                  | Control | 2     | 0     |
| Sphingidae       | Sample  | 4     | 0     |
|                  | Control | 2     | 0     |
| Drepanidae       | Sample  | 1     | 0     |
|                  | Control | 0     | 0     |
| Diurna           | Sample  | 1     | 1     |
|                  | Control | 0     | 1     |
| Microlepidoptera | Sample  | 276   | 49    |
|                  | Control | 146   | 37    |
| Lepidoptera      | Sample  | 470   | 184   |
|                  | Control | 227   | 133   |
