# Supplementary material for: Enhanced Natural Regeneration Potential of Sessile Oak in Northern Hungary: Role of Artificially Increased Density of Insectivorous Birds
Source: MDPI journal article supplement (doi:10.3390/f14081548), 2023-07-28
Supplement: s1 [file s1]

**Table S1.** Forest habitat connected species in Hungary their foraging, nesting and population information

| Scientific name                      | Common name                | Realm      | Trophic level | Trophic niche         | Foraging niche             | Occurance in Hungary              | Population size     | Nesting place                    |
|--------------------------------------|----------------------------|------------|---------------|-----------------------|----------------------------|-----------------------------------|---------------------|----------------------------------|
| <i>Erithacus rubecula</i>            | European Robin             | Palearctic | Carnivore     | Omnivore              | NA                         | Regular nester/Regularly occuring | 266,000-284,000     | tree holes with large entrance   |
| <i>Ficedula parva</i>                | Red-breasted Flycatcher    | Palearctic | Carnivore     | Invertivore           | Generalist                 | Regular nester/Regularly occuring | 40-65               | tree holes with large entrance   |
| <i>Strix uralensis</i>               | Ural Owl                   | Palearctic | Carnivore     | Vertivore             | Vertivore perch            | Regular nester/Regularly occuring | 120-280             | tree holes or crown              |
| <i>Certhia brachydactyla</i>         | Short-toed Treecreeper     | Palearctic | Carnivore     | Invertivore           | Invertivore bark           | Regular nester/Regularly occuring | 20,000-30,000       | tree holes and behind loose bark |
| <i>Certhia familiaris</i>            | Eurasian Treecreeper       | Palearctic | Omnivore      | Invertivore           | Invertivore bark           | Regular nester/Regularly occuring | 10,000-15,000       | tree holes and behind loose bark |
| <i>Columba oenas</i>                 | Stock Dove                 | Palearctic | Herbivore     | Omnivore              | NA                         | Regular nester/Regularly occuring | 10,000-14,000       | tree holes                       |
| <i>Cyanistes caeruleus</i>           | Eurasian Blue Tit          | Palearctic | Omnivore      | Invertivore           | Invertivore glean arboreal | Regular nester/Regularly occuring | 207,000-219,000     | tree holes                       |
| <i>Dendrocopos leucotos</i>          | White-backed Woodpecker    | Palearctic | Carnivore     | Invertivore           | Invertivore bark           | Regular nester/Regularly occuring | 260-760             | tree holes                       |
| <i>Dendrocopos major</i>             | Great Spotted Woodpecker   | Palearctic | Omnivore      | Omnivore              | NA                         | Regular nester/Regularly occuring | 252,000-297,000     | tree holes                       |
| <i>Dendrocopos syriacus</i>          | Syrian Woodpecker          | Palearctic | Omnivore      | Invertivore           | Invertivore bark           | Regular nester/Regularly occuring | 21,000-37,000       | tree holes                       |
| <i>Dendrocoptes medius</i>           | Middle Spotted Woodpecker  | Palearctic | Carnivore     | Invertivore           | Invertivore bark           | Regular nester/Regularly occuring | 16,000-22,500       | tree holes                       |
| <i>Dryobates minor</i>               | Lesser Spotted Woodpecker  | Palearctic | Carnivore     | Invertivore           | Invertivore bark           | Regular nester/Regularly occuring | 12,000-29,000       | tree holes                       |
| <i>Dryocopus martius</i>             | Black Woodpecker           | Palearctic | Carnivore     | Invertivore           | Invertivore bark           | Regular nester/Regularly occuring | 8,800-10,300        | tree holes                       |
| <i>Falco tinnunculus</i>             | Common Kestrel             | Palearctic | Carnivore     | Vertivore             | Vertivore air to surface   | Regular nester/Regularly occuring | 7,000-10,000        | tree holes                       |
| <i>Ficedula albicollis</i>           | Collared Flycatcher        | Palearctic | Carnivore     | Invertivore           | Invertivore sally air      | Regular nester/Regularly occuring | 76,000-81,000       | tree holes                       |
| <i>Ficedula hypoleuca</i>            | European Pied Flycatcher   | Palearctic | Carnivore     | Invertivore           | Generalist                 | Rare nester/Regularly occurring   | 30-60               | tree holes                       |
| <i>Jynx torquilla</i>                | Eurasian Wryneck           | Palearctic | Carnivore     | Invertivore           | Invertivore ground         | Regular nester/Regularly occuring | 18,200-25,000       | tree holes                       |
| <i>Lophophanes cristatus</i>         | European Crested Tit       | Palearctic | Omnivore      | Invertivore           | Invertivore glean arboreal | Regular nester/Regularly occuring | 1500-2000           | tree holes                       |
| <i>Otus scops</i>                    | Eurasian Scops Owl         | Palearctic | Carnivore     | Invertivore           | Generalist                 | Regular nester/Regularly occuring | 800-2,400           | tree holes                       |
| <i>Parus major</i>                   | Great Tit                  | Palearctic | Omnivore      | Invertivore           | Invertivore glean arboreal | Regular nester/Regularly occuring | 1,130,000-1,158,000 | tree holes                       |
| <i>Periparus ater</i>                | Coal Tit                   | Palearctic | Omnivore      | Invertivore           | Generalist                 | Regular nester/Regularly occuring | 16,000-30,000       | tree holes                       |
| <i>Picus canus</i>                   | Grey-headed Woodpecker     | Palearctic | Carnivore     | Invertivore           | Invertivore bark           | Regular nester/Regularly occuring | 2,000-6,000         | tree holes                       |
| <i>Picus viridis</i>                 | European Green Woodpecker  | Palearctic | Carnivore     | Invertivore           | Invertivore ground         | Regular nester/Regularly occuring | 22,000-30,000       | tree holes                       |
| <i>Poecile montanus</i>              | Willow Tit                 | Palearctic | Omnivore      | Invertivore           | Invertivore glean arboreal | Regular nester/Regularly occuring | 1,000-1,500         | tree holes                       |
| <i>Poecile palustris</i>             | Marsh Tit                  | Palearctic | Omnivore      | Invertivore           | Invertivore glean arboreal | Regular nester/Regularly occuring | 105,000-160,000     | tree holes                       |
| <i>Sitta europaea</i>                | Eurasian Nuthatch          | Palearctic | Carnivore     | Invertivore           | Invertivore bark           | Regular nester/Regularly occuring | 168,000-179,000     | tree holes                       |
| <i>Strix aluco</i>                   | Tawny Owl                  | Palearctic | Carnivore     | Vertivore             | Vertivore perch            | Regular nester/Regularly occuring | 5,000-8,000         | tree holes                       |
| <i>Sturnus vulgaris</i>              | Common Starling            | Palearctic | Omnivore      | Omnivore              | NA                         | Regular nester/Regularly occuring | 710,000-990,000     | tree holes                       |
| <i>Streptopelia turtur</i>           | European Turtle Dove       | Palearctic | Herbivore     | Granivore             | Granivore ground           | Regular nester/Regularly occuring | 80,000-120,000      | tall shrub                       |
| <i>Troglodytes troglodytes</i>       | Eurasian Wren              | Palearctic | Carnivore     | Invertivore           | Invertivore glean arboreal | Regular nester/Regularly occuring | 46,000-71,000       | shrub or holes                   |
| <i>Coccothraustes coccothraustes</i> | Hawfinch                   | Palearctic | Herbivore     | Omnivore              | NA                         | Regular nester/Regularly occuring | 124,000-174,000     | shrub or crown                   |
| <i>Fringilla coelebs</i>             | Common Chaffinch           | Palearctic | Omnivore      | Invertivore           | Generalist                 | Regular nester/Regularly occuring | 1,279,000-1,332,000 | shrub or crown                   |
| <i>Pyrrhula pyrrhula</i>             | Eurasian Bullfinch         | Palearctic | Herbivore     | Omnivore              | NA                         | Regular nester/Regularly occuring | 5-15                | shrub or crown                   |
| <i>Turdus merula</i>                 | Common Blackbird           | Palearctic | Omnivore      | Omnivore              | NA                         | Regular nester/Regularly occuring | 950,000-1,070,000   | shrub or crown                   |
| <i>Acanthis flammea</i>              | Common Redpoll             | Palearctic | Herbivore     | Granivore             | Generalist                 | Regularly occurring               | 0                   | shrub                            |
| <i>Aegithalos caudatus</i>           | Long-tailed Tit            | Palearctic | Carnivore     | Invertivore           | Invertivore glean arboreal | Regular nester/Regularly occuring | 162,000-216,000     | shrub                            |
| <i>Chloris chloris</i>               | European Greenfinch        | Palearctic | Herbivore     | Granivore             | Generalist                 | Regular nester/Regularly occuring | 374,000-388,000     | shrub                            |
| <i>Curruca communis</i>              | Common Whitethroat         | Palearctic | Omnivore      | Invertivore           | Invertivore glean arboreal | Regular nester/Regularly occuring | 235,000-249,000     | shrub                            |
| <i>Curruca nisoria</i>               | Barred Warbler             | Palearctic | Carnivore     | Invertivore           | Invertivore glean arboreal | Regular nester/Regularly occuring | 25,000-30,000       | shrub                            |
| <i>Emberiza cirlus</i>               | Cirl Bunting               | Palearctic | Omnivore      | Granivore             | Granivore ground           | Rare nester/Rarely occurs         | 0                   | shrub                            |
| <i>Hippolais icterina</i>            | Icterine Warbler           | Palearctic | Carnivore     | Invertivore           | Invertivore glean arboreal | Regular nester/Regularly occuring | 3,000-5,000         | shrub                            |
| <i>Iduna pallida</i>                 | Eastern Olivaceous Warbler | Palearctic | Carnivore     | Invertivore           | Invertivore glean arboreal | Regular nester/Regularly occuring | 180-250             | shrub                            |
| <i>Lanius collurio</i>               | Red-backed Shrike          | Palearctic | Carnivore     | Invertivore           | Invertivore sally ground   | Regular nester/Regularly occuring | 150,000-170,000     | shrub                            |
| <i>Lanius senator</i>                | Woodchat Shrike            | Palearctic | Carnivore     | Invertivore           | Invertivore sally ground   | Rarely occurs                     | 0                   | shrub                            |
| <i>Linaria cannabina</i>             | Common Linnet              | Palearctic | Herbivore     | Granivore             | Granivore ground           | Regular nester/Regularly occuring | 73,000-98,000       | shrub                            |
| <i>Locustella fluviatilis</i>        | River Warbler              | Palearctic | Carnivore     | Invertivore           | Invertivore glean arboreal | Regular nester/Regularly occuring | 13,000-30,000       | shrub                            |
| <i>Luscinia luscinia</i>             | Thrush Nightingale         | Palearctic | Carnivore     | Invertivore           | Invertivore ground         | Rare nester/Regularly occurring   | 0-5                 | shrub                            |
| <i>Luscinia megarhynchos</i>         | Common Nightingale         | Palearctic | Carnivore     | Invertivore           | Invertivore ground         | Regular nester/Regularly occuring | 493,000-505,000     | shrub                            |
| <i>Muscicapa striata</i>             | Spotted Flycatcher         | Palearctic | Carnivore     | Invertivore           | Invertivore sally air      | Regular nester/Regularly occuring | 41,000-67,000       | shrub                            |
| <i>Phylloscopus collybita</i>        | Common Chiffchaff          | Palearctic | Carnivore     | Invertivore           | Invertivore glean arboreal | Regular nester/Regularly occuring | 432,000-444,000     | shrub                            |
| <i>Prunella modularis</i>            | Dunnock                    | Palearctic | Omnivore      | Invertivore           | Invertivore ground         | Regular nester/Regularly occuring | 500-1,000           | shrub                            |
| <i>Sylvia atricapilla</i>            | Eurasian Blackcap          | Palearctic | Omnivore      | Omnivore              | NA                         | Regular nester/Regularly occuring | 1,056,000-1,104,000 | shrub                            |
| <i>Sylvia borin</i>                  | Garden Warbler             | Palearctic | Omnivore      | Omnivore              | NA                         | Regular nester/Regularly occuring | 300-800             | shrub                            |
| <i>Turdus philomelos</i>             | Song Thrush                | Palearctic | Omnivore      | Invertivore           | Invertivore ground         | Regular nester/Regularly occuring | 366,000-430,000     | shrub                            |
| <i>Apus apus</i>                     | Common Swift               | Palearctic | Carnivore     | Invertivore           | Invertivore aerial         | Regular nester/Regularly occuring | 3,000-5,000         | rock crevices                    |
| <i>Cuculus canorus</i>               | Common Cuckoo              | Palearctic | Carnivore     | Invertivore           | Invertivore glean arboreal | Regular nester/Regularly occuring | 66,000-70,000       | NA                               |
| <i>Passer montanus</i>               | Eurasian Tree Sparrow      | Palearctic | Omnivore      | Granivore             | Granivore ground           | Regular nester/Regularly occuring | 1,552,000-1,646,000 | holes                            |
| <i>Phoenicurus phoenicurus</i>       | Common Redstart            | Palearctic | Carnivore     | Invertivore           | Invertivore sally ground   | Regular nester/Regularly occuring | 60-180              | holes                            |
| <i>Lullula arborea</i>               | Woodlark                   | Palearctic | Omnivore      | Omnivore              | NA                         | Regular nester/Regularly occuring | 8,000-15,000        | ground, under shrub              |
| <i>Emberiza citrinella</i>           | Yellowhammer               | Palearctic | Herbivore     | Granivore             | Granivore ground           | Regular nester/Regularly occuring | 493,000-508,000     | ground or shrub                  |
| <i>Phylloscopus trochilus</i>        | Willow Warbler             | Palearctic | Carnivore     | Invertivore           | Invertivore glean arboreal | Regular nester/Regularly occuring | 15,000-20,000       | ground or shrub                  |
| <i>Anthus trivialis</i>              | Tree Pipit                 | Palearctic | Omnivore      | Invertivore           | Invertivore ground         | Regular nester/Regularly occuring | 84,000-130,000      | ground                           |
| <i>Caprimulgus europaeus</i>         | European Nightjar          | Palearctic | Carnivore     | Invertivore           | Invertivore aerial         | Regular nester/Regularly occuring | 6,000-10,000        | ground                           |
| <i>Emberiza hortulana</i>            | Ortolan Bunting            | Palearctic | Omnivore      | Omnivore              | NA                         | Rare nester/Rarely occurs         | 0-1                 | ground                           |
| <i>Emberiza rustica</i>              | Rustic Bunting             | Palearctic | Herbivore     | Granivore             | Granivore ground           | Rarely occurs                     | 0                   | ground                           |
| <i>Phylloscopus sibilatrix</i>       | Wood Warbler               | Palearctic | Carnivore     | Invertivore           | Invertivore glean arboreal | Regular nester/Regularly occuring | 54,000-58,000       | ground                           |
| <i>Scolopax rusticola</i>            | Eurasian Woodcock          | Palearctic | Carnivore     | Omnivore              | NA                         | Regular nester/Regularly occuring | 50-100              | ground                           |
| <i>Tetrastes bonasia</i>             | Hazel Grouse               | Palearctic | Herbivore     | Herbivore terrestrial | Herbivore ground           | Rare nester/Rarely occurs         | 20-40               | ground                           |
| <i>Tringa ochropus</i>               | Green Sandpiper            | Palearctic | Carnivore     | Aquatic predator      | Aquatic ground             | Regularly occurring               | 0                   | ground                           |
| <i>Accipiter brevipes</i>            | Levant Sparrowhawk         | Palearctic | Carnivore     | Vertivore             | Vertivore air to surface   | Rare nester/Rarely occurs         | 0                   | crown                            |
| <i>Accipiter gentilis</i>            | Northern Goshawk           | Palearctic | Carnivore     | Vertivore             | Vertivore perch            | Regular nester/Regularly occuring | 1,200-1,600         | crown                            |
| <i>Aquila heliaca</i>                | Eastern Imperial Eagle     | Palearctic | Carnivore     | Vertivore             | Generalist                 | Regular nester/Regularly occuring | 155-222             | crown                            |
| <i>Asio otus</i>                     | Long-eared Owl             | Palearctic | Carnivore     | Vertivore             | Vertivore air to surface   | Regular nester/Regularly occuring | 6,000-8,000         | crown                            |
| <i>Buteo buteo</i>                   | Common Buzzard             | Palearctic | Carnivore     | Vertivore             | Vertivore perch            | Regular nester/Regularly occuring | 18,000-24,000       | crown                            |
| <i>Ciconia nigra</i>                 | Black Stork                | Palearctic | Carnivore     | Aquatic predator      | Aquatic ground             | Regular nester/Regularly occuring | 350-400             | crown                            |
| <i>Circetus gallicus</i>             | Short-toed Snake Eagle     | Palearctic | Carnivore     | Vertivore             | Vertivore air to surface   | Regular nester/Regularly occuring | 41-45               | crown                            |
| <i>Clanga pomarina</i>               | Lesser Spotted Eagle       | Palearctic | Carnivore     | Vertivore             | Generalist                 | Regular nester/Regularly occuring | 29-36               | crown                            |
| <i>Columba palumbus</i>              | Common Wood Pigeon         | Palearctic | Herbivore     | Omnivore              | NA                         | Regular nester/Regularly occuring | 152,000-165,000     | crown                            |
| <i>Falco subbuteo</i>                | Eurasian Hobby             | Palearctic | Carnivore     | Invertivore           | Invertivore aerial         | Regular nester/Regularly occuring | 1,600-2,500         | crown                            |
| <i>Garrulus glandarius</i>           | Eurasian Jay               | Palearctic | Omnivore      | Omnivore              | NA                         | Regular nester/Regularly occuring | 66,000-80,000       | crown                            |
| <i>Haliaeetus albicilla</i>          | White-tailed Eagle         | Palearctic | Carnivore     | Aquatic predator      | Aquatic aerial             | Regular nester/Regularly occuring | 311-336             | crown                            |
| <i>Hieraaetus pennatus</i>           | Booted Eagle               | Palearctic | Carnivore     | Vertivore             | Generalist                 | Rare nester/Rarely occurs         | 0-1                 | crown                            |
| <i>Lanius minor</i>                  | Lesser Grey Shrike         | Palearctic | Carnivore     | Invertivore           | Invertivore sally ground   | Regular nester/Regularly occuring | 3,000-4,000         | crown                            |
| <i>Loxia curvirostra</i>             | Red Crossbill              | Palearctic | Herbivore     | Granivore             | Granivore arboreal         | Regular nester/Regularly occuring | 200-400             | crown                            |
| <i>Milvus migrans</i>                | Black Kite                 | Palearctic | Omnivore      | Omnivore              | NA                         | Regular nester/Regularly occuring | 121-169             | crown                            |
| <i>Milvus milvus</i>                 | Red Kite                   | Palearctic | Omnivore      | Omnivore              | NA                         | Rare nester/Regularly occurring   | 9-12                | crown                            |
| <i>Nucifraga caryocatactes</i>       | Spotted Nutcracker         | Palearctic | Omnivore      | Granivore             | Granivore arboreal         | Regularly occurring               | 0                   | crown                            |
| <i>Oriolus oriolus</i>               | Eurasian Golden Oriole     | Palearctic | Omnivore      | Omnivore              | NA                         | Regular nester/Regularly occuring | 152,000-156,000     | crown                            |
| <i>Pernis apivorus</i>               | European Honey Buzzard     | Palearctic | Carnivore     | Invertivore           | Invertivore bark           | Regular nester/Regularly occuring | 800-1,000           | crown                            |
| <i>Regulus ignicapilla</i>           | Common Firecrest           | Palearctic | Carnivore     | Invertivore           | Invertivore glean arboreal | Regular nester/Regularly occuring | 400-500             | crown                            |
| <i>Regulus regulus</i>               | Goldcrest                  | Palearctic | Carnivore     | Invertivore           | Invertivore glean arboreal | Regular nester/Regularly occuring | 5,000-12,000        | crown                            |
| <i>Spinus spinus</i>                 | Eurasian Siskin            | Palearctic | Herbivore     | Granivore             | Granivore arboreal         | Regular nester/Regularly occuring | 100-150             | crown                            |
| <i>Turdus viscivorus</i>             | Mistle Thrush              | Palearctic | Omnivore      | Omnivore              | NA                         | Regular nester/Regularly occuring | 7,000-12,000        | crown                            |
| <i>Corvus corax</i>                  | Northern Raven             | Palearctic | Omnivore      | Omnivore              | NA                         | Regular nester/Regularly occuring | 4,000-6,000         | cliffs or crown                  |
| <i>Falco cherrug</i>                 | Saker Falcon               | Palearctic | Carnivore     | Vertivore             | Generalist                 | Regular nester/Regularly occuring | 145-175             | cliffs or crown                  |
| <i>Phoenicurus ochruros</i>          | Black Redstart             | Palearctic | Omnivore      | Invertivore           | Invertivore sally ground   | Regular nester/Regularly occuring | 172,000-181,000     | cliffs                           |

**References**

Csőrgő, T.; Haraszthy, L.; Kárpáti, L.; Molnár, L.; Schmidt, E. [Identification key for the Birds of Hungary] In Hungarian; Haraszthy, L., Ed.; Mezőgazdasági Könyvkiadó Vállalat: Debrecen, HU, 1990; ISBN: 963-234-061-2.  
Szép, T.; Csörgő, T.; Halmos, G.; Lovászi, P.; Nagy, K.; Schmidt, A. [Bird atlas of Hungary] In Hungarian; 2nd ed.; Agrárminisztérium, MME: Budapest, HU, 2022; ISBN: 978-615-6446-04-6.  
Pigot, A.L.; Sheard, C.; Miller, E.T.; Bregman, T.P.; Freeman, B.G.; Roll, U.; Seddon, N.; Trisos, C.H.; Weeks, B.C.; Tobias, J.A. Macroevolutionary Convergence Connects Morphological Form to Ecological Function in Birds. Nat. Ecol. Evol. 2020, 4, 230–239, doi:10.1038/s41559-019-1070-4.  
Ónodi, G.; Winkler, D. [The role of dead wood in the formation of hollow breeder bird communities] In Hungarian; In Silva Naturalis Vol. 5 - A holtfa; Csóka, G., Lakatos, F., Eds.; Nyugat-magyarországi Egyetem: Sopron, 2014; pp. 125–144 ISBN 978-963-334-207-7.
