# Supplementary material for: Enhanced Natural Regeneration Potential of Sessile Oak in Northern Hungary: Role of Artificially Increased Density of Insectivorous Birds
Source: MDPI journal article supplement (doi:10.3390/f14081548), 2023-07-28
Supplement: s1 [file s1]

**Table S8.** Results of statistics of data collected by funnel traps baited with NAA

Laplace <- glmer(ABUNDANCE.t ~ SITE:SEASON:SUBSEASON:FLEDGED\_CHICKS + (1 | SITE/SEASON/TRAP\_ID), data = FUNNEL\_NAA, family = gaussian(link = "log"), nAGQ = 1)

summary(Laplace)

Generalized linear mixed model fit by maximum likelihood (Laplace Approximation) ['glmerMod']

Family: gaussian ( log )

Formula: ABUNDANCE.t ~ SITE:SEASON:SUBSEASON:FLEDGED\_CHICKS + (1 | SITE/SEASON/TRAP\_ID)

| AIC    | BIC    | logLik  | deviance | df.resid |
|--------|--------|---------|----------|----------|
| 4796.3 | 4844.1 | -2387.2 | 4774.3   | 560      |

Scaled residuals:

| Min     | 1Q      | Median  | 3Q     | Max    |
|---------|---------|---------|--------|--------|
| -1.1013 | -0.4193 | -0.1907 | 0.0066 | 5.3969 |

Random effects:

| Groups                | Name        | Variance              | Std.Dev.              |
|-----------------------|-------------|-----------------------|-----------------------|
| TRAP_ID:(SEASON:SITE) | (Intercept) | 0.00                  | 0.00                  |
| SEASON:SITE           | (Intercept) | 3.59                  | 5.99                  |
| SITE                  | (Intercept) | 4.58×10 <sup>-8</sup> | 2.14×10 <sup>-4</sup> |
| Residual              |             | 2.31×10 <sup>2</sup>  | 15.20                 |

Number of obs: 571, groups: TRAP\_ID:(SEASON: SITE), 36; SEASON: SITE, 6; SITE, 2

Fixed effects:

|                                                        | Estimate | Std.<br>Error | t value | Pr(> z )             |     |
|--------------------------------------------------------|----------|---------------|---------|----------------------|-----|
| (Intercept)                                            | 1.97890  | 0.22149       | 8.934   | <2×10 <sup>-16</sup> | *** |
| SITESample:SEASONfirst:SUBSEASONspring:FLEDGED_CHICKS  | -0.00153 | 0.00125       | -1.223  | 0.221                |     |
| SITESample:SEASONsecond:SUBSEASONspring:FLEDGED_CHICKS | -0.00166 | 0.00150       | -1.103  | 0.270                |     |
| SITESample:SEASONthird:SUBSEASONspring:FLEDGED_CHICKS  | 0.00045  | 0.00130       | 0.344   | 0.731                |     |
| SITESample:SEASONfirst:SUBSEASONwinter:FLEDGED_CHICKS  | -0.00339 | 0.00280       | -1.211  | 0.226                |     |
| SITESample:SEASONsecond:SUBSEASONwinter:FLEDGED_CHICKS | -0.00420 | 0.00370       | -1.136  | 0.256                |     |
| SITESample:SEASONthird:SUBSEASONwinter:FLEDGED_CHICKS  | 0.00274  | 0.00126       | 2.183   | 0.029                | *   |

---

Signif. codes: 0 '\*\*\*' 0.001 '\*\*' 0.01 '\*' 0.05 '.' 0.1 ' ' 1
