# Supplementary material for: Enhanced Natural Regeneration Potential of Sessile Oak in Northern Hungary: Role of Artificially Increased Density of Insectivorous Birds
Source: MDPI journal article supplement (doi:10.3390/f14081548), 2023-07-28
Supplement: s1 [file s1]

Enhanced natural regeneration potential of sessile oak in Northern Hungary – role of artificially increased density of insectivorous birds  
by Csaba Béla Eötvös, Ágnes Fürjes-Mikó, Márton Paulin, Csaba Gáspár, Marcell Kárpáti, Anikó Hirka and György Csóka"

**Table S9.** Results of statistics of acorn crop data

Laplace <- glmer(Abundance.t ~ Fledged\_chicks:Site:State + (1 | Year/Site/Quadrat\_ID), data = Acorn, family = gaussian(link = "log"), nAGQ = 1)

summary(Laplace)

Generalized linear mixed model fit by maximum likelihood (Laplace Approximation) ['glmerMod']

Family: gaussian ( log )

Formula: Abundance.t ~ Fledged\_chicks:Site:State + (1 | Year/Site/ Quadrat\_ID)

| AIC     | BIC     | logLik   | deviance | df.resid |
|---------|---------|----------|----------|----------|
| 21161.3 | 21210.7 | -10571.6 | 21143.3  | 1791     |

Scaled residuals:

| Min     | 1Q      | Median  | 3Q     | Max    |
|---------|---------|---------|--------|--------|
| -8.9399 | -0.0876 | -0.0038 | 0.0637 | 15.332 |

Random effects:

| Groups                 | Name        | Variance | Std.Dev. |
|------------------------|-------------|----------|----------|
| Quadrat_ID:(Site:Year) | (Intercept) | 1487.13  | 38.56    |
| Site:Year              | (Intercept) | 90.75    | 9.53     |
| Year                   | (Intercept) | 997.32   | 31.58    |
| Residual               |             | 1152.51  | 33.95    |

Number of obs: 1800, groups: Quadrat\_ID:(Site:Year), 450; Site:Year, 6; Year, 3

Fixed effects:

|                                           | Estimate | Std. Error | t value | Pr(> z )              |
|-------------------------------------------|----------|------------|---------|-----------------------|
| (Intercept)                               | 2.31625  | 0.55693    | 4.159   | 3.20×10 <sup>-5</sup> |
| Fledged_chicks:SiteSample:StateAborted    | -0.00457 | 0.00087    | -5.271  | 1.36×10 <sup>-7</sup> |
| Fledged_chicks:SiteSample:StateAll_acorns | 0.00206  | 0.00073    | 2.829   | 0.005                 |
| Fledged_chicks:SiteSample:StateHealthy    | -0.00357 | 0.00080    | -4.474  | 7.69×10 <sup>-6</sup> |
| Fledged_chicks:SiteSample:StateViable     | -0.00122 | 0.00074    | -1.639  | 0.101                 |

---  
Signif. codes: 0 ‘\*\*\*’ 0.001 ‘\*\*’ 0.01 ‘\*’ 0.05 ‘.’ 0.1 ‘ ’ 1
