# Supplementary material for: Enhanced Natural Regeneration Potential of Sessile Oak in Northern Hungary: Role of Artificially Increased Density of Insectivorous Birds
Source: MDPI journal article supplement (doi:10.3390/f14081548), 2023-07-28
Supplement: s1 [file s1]

"Supplementary material to the paper

Enhanced natural regeneration potential of sessile oak in Northern Hungary – role of artificially increased density of insectivorous birds

by Csaba Béla Eötvös, Ágnes Fürjes-Mikó, Márton Paulin, Csaba Gáspár, Marcell Kárpáti, Anikó Hirka and György Csóka"

**Table S4. Estimated number of caterpillars at sample site and the proportion of consumed caterpillars at each study year**

| Caterpillars/100 leaves [1] | Tree density/ha | Area of sample site (ha) | Estimated number of leaves on a tree | Estimated number of caterpillars at the sample site |
|-----------------------------|-----------------|--------------------------|--------------------------------------|-----------------------------------------------------|
| 1.28                        | 700             | 5                        | 20,000-40,000                        | 896,000-1,792,000                                   |

| Year | Caterpillar consumed | Proportion of the consumed caterpillars at the sample site |
|------|----------------------|------------------------------------------------------------|
| 2018 | 183,115              | 10.5-21.0%                                                 |
| 2019 | 267,783              | 15.4-30.8%                                                 |
| 2020 | 255,012              | 14.7-29.4%                                                 |
| 2021 | 259,366              | 14.9-29.8%                                                 |
| 2022 | 227,764              | 13.1-26.2%                                                 |

1. Bereczki, K.; Ódor, P.; Csóka, G.; Mag, Z.; Báldi, A. Effects of forest heterogeneity on the efficiency of caterpillar control service provided by birds in temperate oak forests. *For. Ecol. Manage.* **2014**, 327, 96–105, doi:10.1016/j.foreco.2014.05.001.
