# Supplementary material for: Enhanced Natural Regeneration Potential of Sessile Oak in Northern Hungary: Role of Artificially Increased Density of Insectivorous Birds
Source: MDPI journal article supplement (doi:10.3390/f14081548), 2023-07-28
Supplement: s1 [file s1]

Supplementary material to the paper

Enhanced natural regeneration potential of sessile oak in Northern Hungary – role of artificially increased density of insectivorous birds

by Csaba Béla Eötvös, Ágnes Fürjes-Mikó, Márton Paulin, Csaba Gáspár, Marcell Kárpáti, Anikó Hirka and György Csóka

**Table S3.** Estimated caterpillar consumption of bird species

| Species                    | Average number of visits per hour | Average day length during breeding (hours) | Average length of breeding (days) | Average number of prey per visit | The percentage of visits when caterpillars are brought to the nestlings | SE     | Caterpillar consumption per brood | SE   | References |
|----------------------------|-----------------------------------|--------------------------------------------|-----------------------------------|----------------------------------|-------------------------------------------------------------------------|--------|-----------------------------------|------|------------|
| <i>Parus major</i>         | 22.6                              | 15                                         | 20                                | 1                                | 61.50%                                                                  | 3.10%  | 4170                              | 210  | [1]        |
| <i>Cyanistes caeruleus</i> | 50.9                              | 15                                         | 20                                | 1                                | 48.30%                                                                  | 13.50% | 7375                              | 2061 | [1]        |
| <i>Ficedula albicollis</i> | 24                                | 15.5                                       | 16                                | 1.8                              | 53.60%                                                                  | NA     | 5742                              | NA   | [2,3]      |
| <i>Sitta europaea</i>      | 19.2                              | 14                                         | 21                                | 1                                | 54.20%                                                                  | 5.90%  | 3059                              | 333  | [4,5]      |

**References:**

1. Cowie, R. J., & Hinsley, S. A. 1988. Feeding Ecology of Great Tits (*Parus major*) and Blue Tits (*Parus caeruleus*), Breeding in Suburban Gardens. *The Journal of Animal Ecology*, 57(2), 611. DOI: 10.2307/4928
2. Krist, M. 2009. Short- and long-term effects of egg size and feeding frequency on offspring quality in the collared flycatcher (*Ficedula albicollis*). *Journal of Animal Ecology*, 78(5), 907–918. DOI: 10.1111/j.1365-2656.2009.01536.x
3. Cauchard, L., Macqueen, E. I., Lilley, R., Bize, P., & Doligez, B. 2021. Inter-individual variation in provisioning rate, prey size and number, and links to total prey biomass delivered to nestlings in the Collared Flycatcher (*Ficedula albicollis*). *Avian Research*, 12(1), 15. DOI: 10.1186/s40657-021-00247-8
4. Krištín, A. 1992. Die Nestlingsnahrung des Kleibers (*Sitta europaea* L.) in Buchenwäldern. *Acta Ornithoecol.*, 4, 341–349.
5. Wesolowski, T., Rowiński, P., & Neubauer, G. 2019. Food of Nuthatch *Sitta europaea* Young in a Primeval Forest: Effects of Varying Food Supply and Age of Nestlings. *Acta Ornithologica*, 54(1), 85. DOI: 10.3161/00016454AO2019.54.1.008
