# Supplementary material for: Enhanced Natural Regeneration Potential of Sessile Oak in Northern Hungary: Role of Artificially Increased Density of Insectivorous Birds
Source: MDPI journal article supplement (doi:10.3390/f14081548), 2023-07-28
Supplement: s1 [file s1]

Enhanced natural regeneration potential of sessile oak in Northern Hungary – role of artificially increased density of insectivorous birds  
by Csaba Béla Eötvös, Ágnes Fürjes-Mikó, Márton Paulin, Csaba Gáspár, Marcell Kárpáti, Anikó Hirka and György Csóka"

**Table S7.** Results of statistics of data collected by funnel traps baited with FLO

Laplace <- glmer(ABUNDANCE.t ~ SITE:SEASON:FLEDGED\_CHICKS + (1 | SITE/SEASON/TRAP\_ID), data = FUNNEL\_FLO, family  
= gaussian(link = "log"), nAGQ = 1)

summary(Laplace)

Generalized linear mixed model fit by maximum likelihood (Laplace Approximation) ['glmerMod']

Family: gaussian ( log )

Formula: ABUNDANCE.t ~ SITE:SEASON:FLEDGED\_CHICKS + (1 | SITE/SEASON/TRAP\_ID)

| AIC    | BIC  | logLik  | deviance | df.resid |
|--------|------|---------|----------|----------|
| 3816.3 | 3850 | -1900.1 | 3800.3   | 495      |

Scaled residuals:

| Min     | 1Q     | Median  | 3Q     | Max    |
|---------|--------|---------|--------|--------|
| -2.4778 | -0.444 | -0.2882 | 0.0316 | 5.6597 |

Random effects:

| Groups                | Name        | Variance              | Std.Dev.              |
|-----------------------|-------------|-----------------------|-----------------------|
| TRAP_ID:(SEASON:SITE) | (Intercept) | 7.94                  | 2.82                  |
| SEASON:SITE           | (Intercept) | 15.20                 | 3.90                  |
| SITE                  | (Intercept) | 4.32×10 <sup>-7</sup> | 6.57×10 <sup>-4</sup> |
| Residual              |             | 75.00                 | 8.66                  |

Number of obs: 503, groups: TRAP\_ID:(SEASON:SITE), 36; SEASON:SITE, 6; SITE, 2

Fixed effects:

|                                        | Estimate | Std. Error | t value | Pr(> z )               |
|----------------------------------------|----------|------------|---------|------------------------|
| (Intercept)                            | 2.01714  | 0.27134    | 7.434   | 1.05×10 <sup>-13</sup> |
| SITESample:SEASONfirst:FLEDGED_CHICKS  | 0.00179  | 0.00134    | 1.339   | 0.180                  |
| SITESample:SEASONsecond:FLEDGED_CHICKS | -0.00190 | 0.00174    | -1.097  | 0.273                  |
| SITESample:SEASONthird:FLEDGED_CHICKS  | -0.00171 | 0.00166    | -1.028  | 0.304                  |

---  
Signif. codes: 0 ‘\*\*\*’ 0.001 ‘\*\*’ 0.01 ‘\*’ 0.05 ‘.’ 0.1 ‘ ’ 1
