# Supplementary material for: Enhanced Natural Regeneration Potential of Sessile Oak in Northern Hungary: Role of Artificially Increased Density of Insectivorous Birds
Source: MDPI journal article supplement (doi:10.3390/f14081548), 2023-07-28
Supplement: s1 [file s1]

Enhanced natural regeneration potential of sessile oak in Northern Hungary – role of artificially increased density of insectivorous birds  
by Csaba Béla Eötvös, Ágnes Fürjes-Mikó, Márton Paulin, Csaba Gáspár, Marcell Kárpáti, Anikó Hirka and György Csóka"

**Table S5.** Results of statistics of data collected by sticky belt trap

Laplace <- glmer(ABUNDANCE.t ~ SITE:SEASON:SUBSEASON:FLEDGED\_CHICKS + (1 | SITE/SEASON), data = STICKY, family = gaussian(link = "log"), nAGQ = 1)

summary(Laplace)

Generalized linear mixed model fit by maximum likelihood (Laplace Approximation) ['glmerMod']

Family: gaussian ( log )

Formula: ABUNDANCE.t ~ SITE:SEASON:SUBSEASON:FLEDGED\_CHICKS + (1 | SITE/SEASON)

| AIC     | BIC     | logLik  | deviance | df.resid |
|---------|---------|---------|----------|----------|
| 14301.5 | 14367.4 | -7140.7 | 14281.5  | 5390     |

Scaled residuals:

| Min     | 1Q      | Median  | 3Q      | Max     |
|---------|---------|---------|---------|---------|
| -0.6116 | -0.3405 | -0.0209 | -0.0076 | 24.6657 |

Random effects:

| Groups      | Name        | Variance              | Std.Dev.              |
|-------------|-------------|-----------------------|-----------------------|
| SEASON:SITE | (Intercept) | 9.73×10 <sup>-3</sup> | 9.87×10 <sup>-2</sup> |
| SITE        | (Intercept) | 1.39×10 <sup>-9</sup> | 3.73×10 <sup>-5</sup> |
| Residual    |             | 8.22×10 <sup>-1</sup> | 9.06×10 <sup>-1</sup> |

Number of obs: 5400, groups: SEASON:SITE, 6; SITE, 2

Fixed effects:

|                                                        | Estimate | Std.<br>Error | t value | Pr(> z ) |     |
|--------------------------------------------------------|----------|---------------|---------|----------|-----|
| (Intercept)                                            | 0.21790  | 0.06359       | 3.427   | 0.00061  | *** |
| SITESample:SEASONFirst:SUBSEASONSpring:FLEDGED_CHICKS  | -0.00010 | 0.00032       | -0.302  | 0.76263  |     |
| SITESample:SEASONSecond:SUBSEASONSpring:FLEDGED_CHICKS | -0.00038 | 0.00042       | -0.899  | 0.36866  |     |
| SITESample:SEASONThird:SUBSEASONSpring:FLEDGED_CHICKS  | -0.00065 | 0.00040       | -1.634  | 0.10227  |     |
| SITESample:SEASONFirst:SUBSEASONWinter:FLEDGED_CHICKS  | 0.00055  | 0.00031       | 1.754   | 0.07942  | .   |
| SITESample:SEASONSecond:SUBSEASONWinter:FLEDGED_CHICKS | 0.00029  | 0.00041       | 0.701   | 0.48337  |     |
| SITESample:SEASONThird:SUBSEASONWinter:FLEDGED_CHICKS  | -0.00066 | 0.00040       | -1.656  | 0.09776  | .   |

---

Signif. codes: 0 '\*\*\*' 0.001 '\*\*' 0.01 '\*' 0.05 '.' 0.1 ' ' 1
