# Supplementary material for: Enhanced Natural Regeneration Potential of Sessile Oak in Northern Hungary: Role of Artificially Increased Density of Insectivorous Birds
Source: MDPI journal article supplement (doi:10.3390/f14081548), 2023-07-28
Supplement: s1 [file s1 › Table S2.pdf]

"Supplementary material to the paper

Enhanced natural regeneration potential of sessile oak in Northern Hungary – role of artificially increased density of insectivorous birds

by Csaba Béla Eötvös, Ágnes Fürjes-Mikó, Márton Paulin, Csaba Gáspár, Marcell Kárpáti, Anikó Hirka and György Csóka"

**Table S2. Moving range, territory and foraging flight distance of hole breeder insectivorous birds**

| Species                    | Mean foraging flight distance (m) | Max. foraging flight distance (m) | Diameter of moving range/territory (m) | Reference |
|----------------------------|-----------------------------------|-----------------------------------|----------------------------------------|-----------|
| <i>Cyanistes caeruleus</i> | 37-56                             | 70                                | NA                                     | [1]       |
| <i>Cyanistes caeruleus</i> | NA                                | NA                                | 54.4-75.3                              | [2]       |
| <i>Parus major</i>         | NA                                | NA                                | 64.9-73.2                              | [2]       |
| <i>Sitta europaea</i>      | NA                                | NA                                | 60.8-234.6                             | [3]       |

1. Stauss, M.J.; Burkhardt, J.F.; Tomiuk, J. Foraging flight distances as a measure of parental effort in blue tits *Parus caeruleus* differ with environmental conditions. *J. Avian Biol.* **2005**, *36*, 47–56, doi:10.1111/j.0908-8857.2005.02855.x.
2. Naef-Daenzer, B. Patch time allocation and patch sampling by foraging great and blue tits. *Anim. Behav.* **2000**, *59*, 989–999, doi:10.1006/anbe.1999.1380.
3. Kašová, M.; Naďo, L.; Kaňuch, P. Structure of tree vegetation may reduce costs of territory defence in Eurasian Nuthatch *Sitta europaea*. *Bird Study* **2014**, *61*, 413–420, doi:10.1080/00063657.2014.933771.
